# Supplementary material for: Investigation of high oxygen reduction reaction catalytic performance on Mn-based mullite SmMn2O5
Source: Royal Society of Chemistry journal article supplement (doi:10.1039/c7ta02905e), 2017-01-01
Supplement: c7ta02905e1.pdf [file c7ta02905e1.pdf]

1  
2  
3  
4  
5  
6  
7  
8  
9  
10  
11  
12  
13  
14  
15  
16  
17  
18  
19  
20  
21  
22  
23  
24  
25

*Supporting Information*

Investigation of High Oxygen Reduction  
Reaction Catalytic Performance on Mn-based  
Mullite  $\text{SmMn}_2\text{O}_5$

Jieyu Liu,<sup>a,†</sup> Meng Yu,<sup>a,†</sup> Xuwei Wang,<sup>b</sup> Jie Wu,<sup>c</sup> Changhong Wang,<sup>d</sup> Lijun Zheng,<sup>a</sup>  
Dachi Yang,<sup>a</sup> Hui Liu,<sup>a</sup> Yan Yao,<sup>c</sup> Feng Lu,<sup>a,\*</sup> and Weichao Wang<sup>a,f\*</sup>

<sup>a</sup>College of Electronic Information and Optical Engineering, Nankai University,  
Tianjin 300350, China

<sup>b</sup>School of Materials Science and Engineering, Tianjin University of Technology,  
Tianjin 300384, China

<sup>c</sup>College of Material Science and Engineering, Shandong University of Science and  
Technology, Qingdao 266590, China

<sup>d</sup>School of Science, Tianjin University of Technology, Tianjin 300384, China

<sup>e</sup>Department of Electrical and Computer Engineering and Materials Science and  
Engineering Program, University of Houston, Houston, TX 77204, USA

<sup>f</sup>Department of Materials Science and Engineering, University of Texas at Dallas,  
Richardson, TX 75080, USA

<sup>†</sup>These authors contributed equally to this work.

\*Corresponding authors: [weichaowang@nankai.edu.cn](mailto:weichaowang@nankai.edu.cn), [lufeng@nankai.edu.cn](mailto:lufeng@nankai.edu.cn)

## 1 ***SI. Bulk SmMn<sub>2</sub>O<sub>5</sub> mullite phase diagram deduction***

2 Following the computational hydrogen electrode (CHE) method proposed by  
3 Norskov,<sup>1-3</sup> zero voltage is defined based on the reversible hydrogen electrode (RHE),  
4 in which the reaction

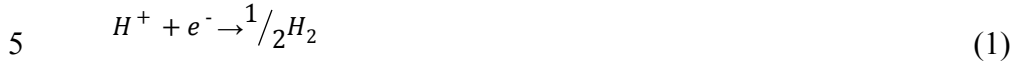

6 is defined to be in equilibrium at zero voltage, at all values of pH, at all temperatures,  
7 and with H<sub>2</sub> gas pressure at 101325 Pa.

8 Thus, the total chemical potential of the proton-electron pair as a function of  
9 applied potential U can be calculated as:

$$10 \quad \mu_{H^+} + \mu_{e^-}(U) = \frac{1}{2}\mu_{H_2} - eU \quad (2)$$

11 The oxygen chemical potential then can be interpreted as:

$$12 \quad \mu_O(U, pH) = \mu_{H_2O} - 2(\mu_{H^+} + \mu_{e^-}(U)) = \mu_{H_2O} - \mu_{H_2} + 2eU \quad (3)$$

13 0.1 M KOH was used as the electrolyte for oxygen reduction reaction (ORR)  
14 activity characterization in our experiment, for simplicity, the corresponding pH in  
15 this work is referred to the experimental condition, i.e. pH = 13

16 The chemical potential of each element in SmMn<sub>2</sub>O<sub>5</sub> crystal is related by the  
17 Gibbs free energy of the bulk oxide:<sup>4</sup>

$$18 \quad \mu_{Sm}^{SmMn_2O_5} + 2\mu_{Mn}^{SmMn_2O_5} + 5\mu_O(U, pH = 13) = E_{SmMn_2O_5}^{bulk} \quad (4)$$

19  $\mu_{Sm}^{SmMn_2O_5}$ ,  $\mu_{Mn}^{SmMn_2O_5}$  and  $\mu_O(U, pH = 13)$  are the chemical potentials of samarium,  
20 manganese and oxygen, respectively.  $E_{SmMn_2O_5}^{bulk}$  is the total energy of bulk per formula  
21 unit SmMn<sub>2</sub>O<sub>5</sub>.

1 Take  $\mu_{Mn}^{SmMn_2O_5}$  as the independent chemical potential.

2 Rearranging equation (4):

3 
$$\mu_{Mn}^{SmMn_2O_5} = 1/2 [E_{SmMn_2O_5}^{bulk} - \mu_{Sm}^{SmMn_2O_5} - 5\mu_O(U, pH = 13)] \quad (5)$$

4 For binary metal oxides, the chemical potential of metals can be written as:

5 
$$\mu_M^{MO_n} = E_{DFT}^{MO_n} - n\mu_O(U, pH = 13) \quad (6)$$

6 where M denotes the metal element (Sm or Mn), and  $E_{DFT}^{MO_n}$  is the calculated total  
7 energy of the corresponding oxides. To prevent bulk  $SmMn_2O_5$  from decomposing  
8 into lower order binary metal oxides, the chemical potential of a metal constituent in  
9 the mullite should be smaller than that in the lower order binary metal oxides:

10 
$$\mu_M^{SmMn_2O_5} < \mu_M^{MO_n} \quad (7)$$

11 We then use the chemical potential deviation of samarium from the elementary  
12 crystal to construct the phase diagram.

13 
$$\Delta\mu_{Sm} = \mu_{Sm} - E_{Sm}^{bulk} \quad (8)$$

14

15

16

17

18

19

20

21

1 **S2. Passivation of 8-layer (001) MnO<sub>3</sub>-2 slab**

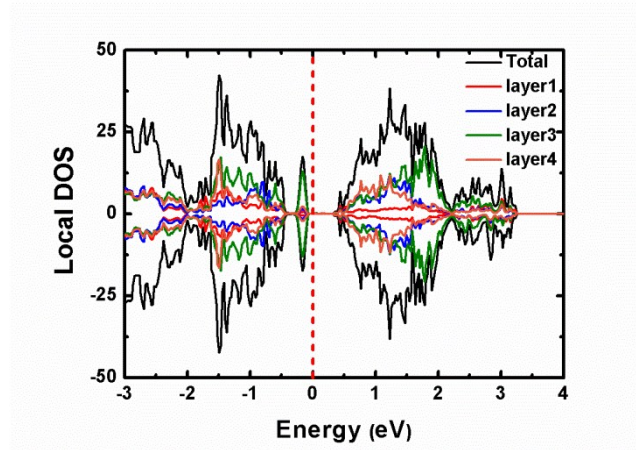

2

3 **Figure S1.** The local density of states (LDOS) of layer-1 to layer-4 of the 8-layer (001)  
 4 MnO<sub>3</sub>-2 slab. The black line represents the total DOS of the bottom four layers (layer-  
 5 1 to layer-4).

6 **S3. Stability of mullite SmMn<sub>2</sub>O<sub>5</sub> (001) surfaces**

7 The relative stability of SmMn<sub>2</sub>O<sub>5</sub> (001) surfaces under the given applied potential (U  
 8 = 0.8 V) and pH (pH = 13) were calculated based on the following equation:<sup>4</sup>

9 
$$\Gamma_i = \frac{1}{A_s} [E_{total}^i - N_O \mu_O(U = 0.8 V, pH = 13) - N_{Mn} \mu_{Mn}^{SmMn_2O_5} - N_{Sm} \mu_{Sm}^{SmMn_2O_5}] \quad (9)$$

10 where  $\Gamma_i$  is the surface energy, i donates the type of slab,  $A_s$  is the surface area of the  
 11 (2×1) (001) slab,  $E_{total}^i$  is the calculated total energy of the slab.  $N_o$ ,  $N_{Mn}$  and  $N_{Sm}$  are the  
 12 numbers of O, Mn and Sm atoms in the slab, respectively.  $\mu_o(U = 0.8 V, pH = 13)$  is  
 13 defined as equation (3).  $\mu_{Mn}^{SmMn_2O_5}$  is the chosen independent chemical potential, which  
 14 is connected with  $\mu_{Sm}^{SmMn_2O_5}$  by equation (5).

15

16

#### 1 ***S4. Linear relations of binding energies***

2 The calculated binding energies of O\* ( $\Delta E_{O^*}$ ), OH\* ( $\Delta E_{OH^*}$ ), OO\* ( $\Delta E_{OO^*}$ ) and

3 OOH\* ( $\Delta E_{OOH^*}$ ) are defined as the reaction energies of the following reactions:

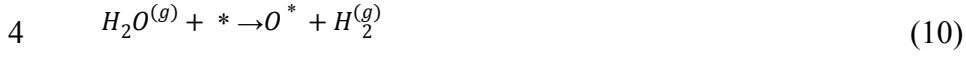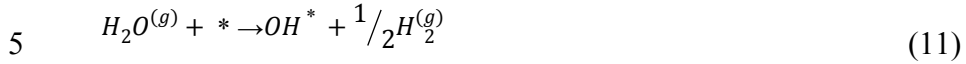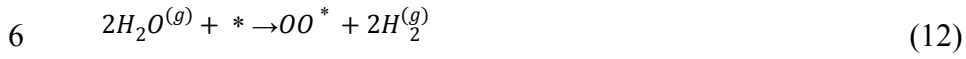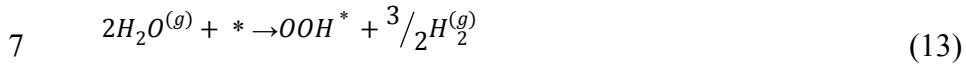

8 where \* donates an adsorption site on the surface. H<sub>2</sub>O and H<sub>2</sub> are in the gas phase.

9 Thus:

10 
$$\Delta E_{O^*} = E_{DFT}^{O^*} + E_{H_2^{(g)}} - E_{H_2O^{(g)}} - E_* \quad (14)$$

11 
$$\Delta E_{OH^*} = E_{DFT}^{OH^*} + \frac{1}{2}E_{H_2^{(g)}} - E_{H_2O^{(g)}} - E_* \quad (15)$$

12 
$$\Delta E_{OO^*} = E_{DFT}^{OO^*} + 2E_{H_2^{(g)}} - 2E_{H_2O^{(g)}} - E_* \quad (16)$$

13 
$$\Delta E_{OOH^*} = E_{DFT}^{OOH^*} + \frac{3}{2}E_{H_2^{(g)}} - 2E_{H_2O^{(g)}} - E_* \quad (17)$$

14

15

16

17

18

19

20

21

1 **S5. Theoretical activity**

2 The free energy change for each step in the main test can be calculated as:<sup>1-3</sup>

3 
$$\Delta G_i = \Delta E_i + \Delta(ZPE)_i - T\Delta S_i + eU + \kappa T \ln 10 \times \Delta pH \quad (18)$$

4 where i = 1, 2, 3, 4 corresponds to steps from Equation (1) to (4) in the main test,  $\Delta E$   
 5 is the reaction energy,  $\Delta ZPE$  is the change of zero-point energy, T is temperature,  $\Delta S$  is  
 6 the difference in entropy, U is the electrode potential vs. standard hydrogen electrode  
 7 (SHE) and  $\kappa$  is boltzmann constant. All these parameters can be obtained from DFT  
 8 calculations or standard tables for gas-phase molecules.<sup>5</sup>

9 At any pH, the following half-reaction:

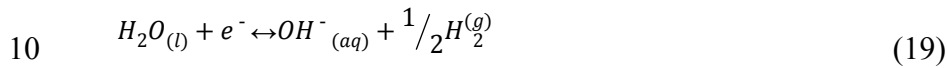

11 has a potential of 0 V vs. RHE.<sup>6</sup> At this potential, the reaction is at equilibrium, and  
 12 thus chemical potentials can be written as Equation (20) at any U:

13 
$$\mu_{H_2O_{(l)}} + \mu_{e^-}(U) = \frac{1}{2}\mu_{H_2^{(g)}} + \mu_{OH^-_{(aq)}} - eU \quad (20)$$

14 Rearranging Equation (20), the chemical potential difference between OH<sup>-</sup> and e<sup>-</sup>  
 15 can be found to be:

16 
$$\mu_{OH^-_{(aq)}} - \mu_{e^-}(U) = \mu_{H_2O_{(l)}} - \frac{1}{2}\mu_{H_2^{(g)}} + eU \quad (21)$$

17 The first step of the four-electron pathway is the displacement of OH\* by OO\*.

18 
$$\Delta G_1 = G_{OO^*} + [\mu_{OH^-_{(aq)}} - \mu_{e^-}(U)] - G_{OH^*} - G_{O_2} \quad (22)$$

19 where  $G_{OO^*}$  and  $G_{OH^*}$  are the free energies of the surface slab with OO\* and OH\*  
 20 adsorption repectively and could be written in terms of DFT energies:

21 
$$G_{OO^*} = E_{DFT}^{OO^*} + ZPE_{OO^*} - TS_{OO^*}^0 \quad (23)$$

1 
$$G_{OH^*} = E_{DFT}^{OH^*} + ZPE_{OH^*} - TS_{OH^*}^0 \quad (24)$$

2 Combine Equation (15) and (16), we get the relationship:

3 
$$E_{DFT}^{OO^*} - E_{DFT}^{OH^*} = \Delta E_{OO^*} - \Delta E_{OH^*} - \frac{3}{2}E_{H_2(g)} + E_{H_2O(g)} \quad (25)$$

4 According to the linear relationship:

5 
$$\Delta E_{OH^*} = 0.62\Delta E_o^* - 0.87 \quad (26)$$

6 
$$\Delta E_{OO^*} = 0.86\Delta E_o^* + 2.68 \quad (27)$$

7 Substitute equations (23) – (27) into (22), then:

8 
$$\Delta G_1 = 0.24\Delta E_o^* - 1.61 \quad (28)$$

9 Similarly:

10 
$$\Delta G_2 = -0.14\Delta E_o^* - 0.32 \quad (29)$$

11 
$$\Delta G_3 = 0.28\Delta E_o^* - 2.47 \quad (30)$$

12 
$$\Delta G_4 = -0.38\Delta E_o^* - 0.52 \quad (31)$$

13

14

15

16

17

18

19

## 1 *S6. Two-electron pathway*

2 We considered a similar associative mechanism for the less efficient two-electron  
3 pathway for hydrogen peroxide production.

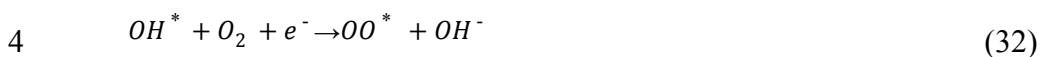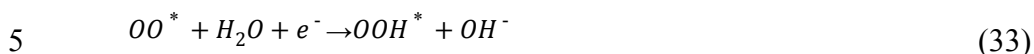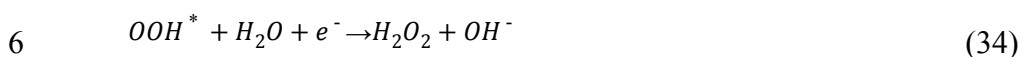

7 In this case, the equilibrium potential is 0.68 V.<sup>7</sup> We plotted the free energy  
8 evolution diagram in Figure S2. It is shown that the potential is limited by the  
9 protonation from  $\text{OO}^*$  to  $\text{OOH}^*$  on the surface of  $\text{MnO}_3$ -1 slab. The ORR steps in the  
10 two-electron pathway are thermodynamically favorable only under low electrode  
11 potential.

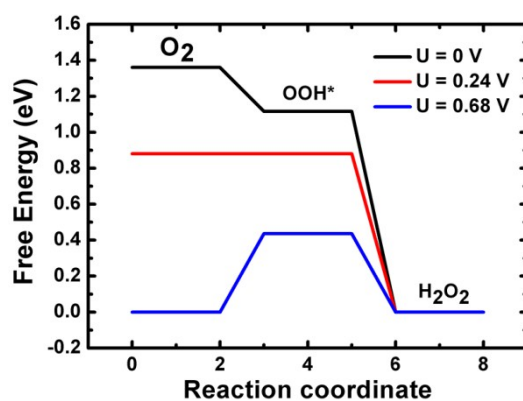

12  
13 **Figure S2.** The free energy diagram of two-electron pathway to produce H<sub>2</sub>O<sub>2</sub> on the  
14 surface of MnO<sub>3</sub>-1 slab.

15

16



## 1 *S7. Synthesis of SmMn<sub>2</sub>O<sub>5</sub>, and MnO<sub>x</sub>*

2 All metal salt precursors were analytical grade and used as received. 0.2777 g  
3 Sm(NO<sub>3</sub>)<sub>3</sub>•6H<sub>2</sub>O (Aladdin) was dissolved in 50 ml deionized water (18.25 MΩ)  
4 followed by adequate stirring. Then 0.0593 g KMnO<sub>4</sub> and 0.2143 g  
5 Mn(CH<sub>3</sub>COO)<sub>2</sub>•6H<sub>2</sub>O (Aladdin) were added to the solution simultaneously and  
6 constantly stirred for at least 30 min. The corresponding mole ratio of Sm-to-Mn is  
7 approximately 1:2. 5.5 mL NaOH (1 M) was dropwise added to the mixture and  
8 continued to stir for several minutes. After that, the precursor was transferred into a  
9 100 ml stainless steel Teflon-lined autoclave, followed by a standard hydrothermal  
10 treatment at 200 °C for 24 h. The final precipitate was washed with nitric acid (5%)  
11 and distilled water for several times, and dried at 100 °C for 12 h. MnO<sub>x</sub> was prepared  
12 via the similar procedure without adding Sm(NO<sub>3</sub>)<sub>3</sub>•6H<sub>2</sub>O. If we change the ratio of  
13 Sm-to-Mn, final products would become a mixture of SmMn<sub>2</sub>O<sub>5</sub>, MnO<sub>x</sub> and even  
14 Sm(OH)<sub>3</sub> (Figure S3). Specifically, extra Sm might introduce Sm(OH)<sub>3</sub>, while  
15 excessive Mn could lead to complicated MnO<sub>x</sub>.

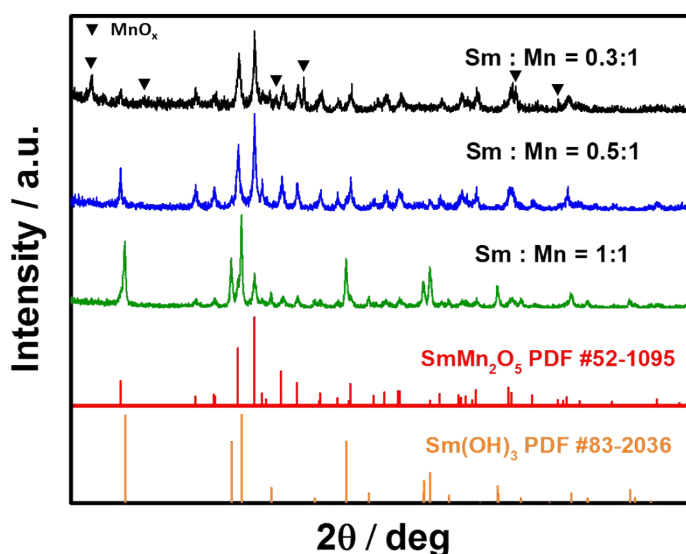

1 **Figure S3.** XRD spectra of the as-prepared  $\text{SmMn}_2\text{O}_5$  and the reference samples by  
 2 changing the stoichiometric ratio of metal precursors.

3

#### 4 ***S8. Electrode preparation***

5 The catalyst inks were prepared by physically mixing 5 mg of catalyst powder and/or  
 6 3 mg of Vulcan X-72 (Carbot Corp.) with 30  $\mu\text{L}$  of Nafion (5 wt. %, Aldrich) and 970  
 7  $\mu\text{L}$  of ethanol, followed by at least 40 min ultrasonication to form homogeneous  
 8 mixtures.<sup>8</sup> 10  $\mu\text{L}$  of these mixtures were carefully dropped onto glassy-carbon (GC)  
 9 electrodes (5-mm diameter) and dried in a sealed glass beaker which had been pre-  
 10 saturated with ethanol vapor in order to slow down drying rate, which was proven to  
 11 be important for obtaining uniform coatings.<sup>9, 10</sup> Finally, all of the electrodes had a  
 12 composition of 250  $\mu\text{g}_{\text{oxide}} \text{cm}^{-2}_{\text{disk}}$  and/or 150  $\mu\text{g}_{\text{carbon}} \text{cm}^{-2}_{\text{disk}}$ , except for Pt/C used as  
 13 a reference. The Pt/C catalyst ink was made by dispersing Pt/C (Johnson Matthey

1 Corp.) in a water-isopropanol solution, of which  $25 \mu\text{g}_{\text{Pt}} \text{cm}^{-2}_{\text{disk}}$  was applied to the  
2 electrode. Before each measurement, GC electrodes were polished with  $0.3 \mu\text{m}$  and  
3 then  $0.05 \mu\text{m}$  alumina slurry to maintain mirror-like surfaces.<sup>11</sup>

#### 4 ***S9. Electrochemical analysis***

5 The number of electrons transferred ( $n$ ) was calculated from the slope of the best  
6 fitted lines of Koutecky–Levich plot ( $J^{-1}$  vs.  $\omega^{-0.5}$ ) at different potentials. The  
7 Koutecky–Levich equation is given as below:

$$8 \quad \frac{1}{J} = \frac{1}{J_L} + \frac{1}{J_K} = \frac{1}{B\omega^{0.5}} + \frac{1}{J_K} \quad (35)$$

$$9 \quad B = 0.62nFC_{O_2}D_{O_2}^{2/3}\nu^{-1/6} \quad (36)$$

$$10 \quad J_K = nFkC_{O_2} \quad (37)$$

11 where  $J$  is the measured current density,  $J_L$  and  $J_K$  are known as the diffusion-limited  
12 and kinetic-limited current density of ORR, respectively.<sup>12</sup>  $F$  ( $96485 \text{ C mol}^{-1}$ ) is the  
13 Faraday constant,  $C_{O_2}$  ( $1.2 \times 10^{-6} \text{ mol cm}^{-3}$ ) is the bulk concentration of oxygen,  $D_{O_2}$   
14 ( $1.9 \times 10^{-5} \text{ cm}^2 \text{ s}^{-1}$ ) is the diffusion constant for oxygen in  $0.1 \text{ M KOH}$  and  $\nu$  ( $0.01$   
15  $\text{cm}^2 \text{ s}^{-1}$ ) is the kinetic viscosity.<sup>13</sup> The constant  $0.62$  in  $B$  is adopted when the rotating  
16 speed  $\omega$  is expressed in  $\text{rad/s}$ . The Tafel slope was obtained from Tafel's equation:

$$17 \quad \eta = a + b \lg J_K \quad (38)$$

18 where  $\eta$  represents the overpotential, and  $J_K$  is the kinetic current density with mass-  
19 transport correction by

$$J_K = \frac{J_L \times J}{J_L - J} \quad (39)$$

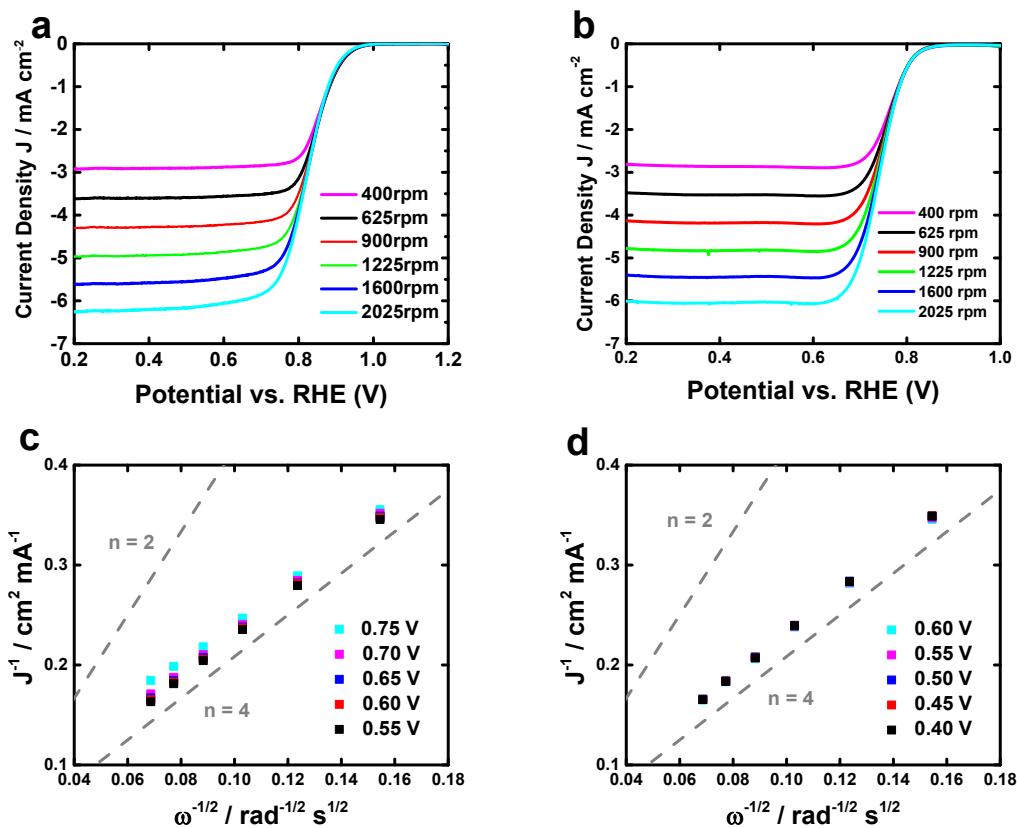

2  
3 **Figure S4.** LSV curves of (a) Pt/C and (b) SmMn<sub>2</sub>O<sub>5</sub>-NRs/C at various rotating speed,  
4 and the corresponding K-L plots of (c) Pt/C and (d) SmMn<sub>2</sub>O<sub>5</sub>-NRs/C at different  
5 potentials.

6 For RRDE analysis, the electron transfer number and proportion of peroxide were  
7 calculated by

$$n = \frac{4I_D}{I_D + (I_R/N_C)} \quad (40)$$

$$\%HO_2^- = 100 \frac{2(I_R/N_C)}{I_D + (I_R/N_C)} \quad (41)$$

1 where  $I_D$  and  $I_R$  are the disk and ring current, respectively.  $N_C$  is the calibrated  
 2 collection efficiency.

3 The calibration process follows the one reported by previous researchers.<sup>14</sup>  
 4 Briefly, the collection efficiency ( $N_C$ ) was calibrated in Ar-saturated electrolyte with  
 5 0.1 M KOH and 4 mM  $K_3Fe(CN)_6$ , using the same electrodes as those used in ORR  
 6 measurements. The electrodes were rotated at a certain angular velocity and then  
 7 chronoamperometric measurement was performed. The disk and ring potential were  
 8 fix to be 0.1 V and 1.5 V vs. RHE, respectively. The  $N_C$  is calculated according to the  
 9 following equation

$$10 \quad N_C = \frac{I_R - I_{R_0}}{I_D} \quad (42)$$

11 where  $I_D$  and  $I_R$  are the disk and ring current averaged over the last 10 s during 60 s  
 12 measurements.  $I_{R_0}$  is the averaged ring current with the disk disconnected.

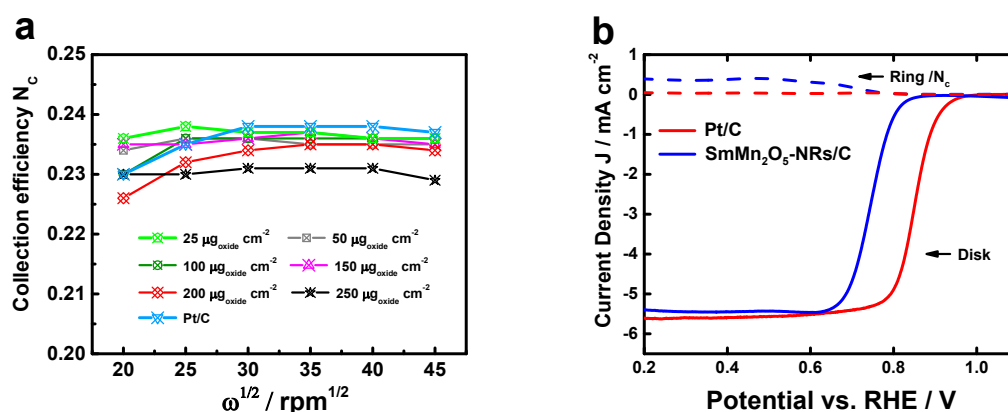

13  
 14 **Figure S5.** (a)  $N_C$  of RRDE loaded with catalysts. (b) Oxygen reduction currents at  
 15 ring and disk  $\text{SmMn}_2\text{O}_5\text{-NRs/C}$  and Pt/C catalysts.

1 ***S10. Electrochemical impedance spectroscopy (EIS) analysis***

2 EIS measurement of  $\text{SmMn}_2\text{O}_5$  catalyst ( $250 \mu\text{g cm}^{-2}_{\text{disk}}$ ) was performed at 0.84 V vs.  
3 RHE in 0.1 M KOH from 10 kHz to 0.1 Hz. A sinusoidal voltage with an amplitude  
4 of 10 mV was applied to the initial voltage. The ohmic resistance of electrolyte  
5 between working and reference electrode ( $R_s$ ) was observed to be  $\sim 42 \Omega$  from Figure  
6 S6. The corrected potential was calculated by the following equation:

7 
$$E_{iR\text{-corrected}} = E_{\text{applied}} - iR_s \quad (43)$$

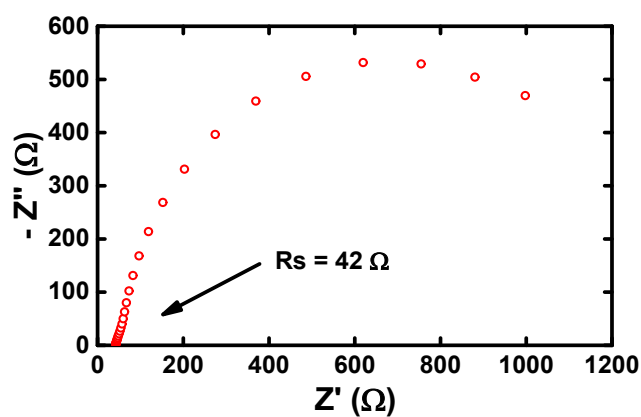

8 **Figure S6.** EIS plot of  $\text{SmMn}_2\text{O}_5$  NRs .

9

10

11

12

13

14

## 1 *S11. ORR activity comparison*

2 *Table S1. The ORR activities of selected manganese-based oxides.*

| Catalyst                            | $E_{\text{onset}}$<br>(V vs. RHE) | $E_{1/2}$<br>(V vs. RHE) | $J_L$<br>(mA/cm <sup>2</sup> ) | n    | Structure    | Ref.      |
|-------------------------------------|-----------------------------------|--------------------------|--------------------------------|------|--------------|-----------|
| SmMn <sub>2</sub> O <sub>5</sub> /C | 0.817                             | 0.746                    | 5.45                           | 3.78 | Nanorod      | This work |
| $\alpha$ -MnO <sub>2</sub> /GC      | 0.89 <sup>⊥</sup>                 | 0.8 <sup>⊥</sup>         | 3.4*                           | 3.89 | Nanorod      | 15        |
| $\beta$ -MnO <sub>2</sub> /C        | 0.85                              | 0.7                      | 2.77                           | 2.4  | Nanorod      | 16        |
| $\sigma$ -MnO <sub>2</sub> /C       | 0.7                               | 0.66                     | 2.67                           | 2.4  | Microsphere  | 16        |
| MnO <sub>x</sub>                    | 0.83 <sup>⊥</sup>                 | 0.73                     | 5.7                            | NA   | Thin film    | 17        |
| Mn <sub>3</sub> O <sub>4</sub> @NGO | 0.83                              | 0.66 <sup>⊥</sup>        | 3.7                            | 3.81 | Ellipsoid    | 18        |
| MnO@GC                              | 0.77 <sup>⊥</sup>                 | 0.64 <sup>⊥</sup>        | 4.5 <sup>⊥</sup>               | NA   | Nanoparticle | 19        |

3 \* The diameter of GC electrode is 4 mm.

4 <sup>⊥</sup> Estimated from LSV.

5

6

7

8

9

10

11

12

1 *S12. Supporting data*

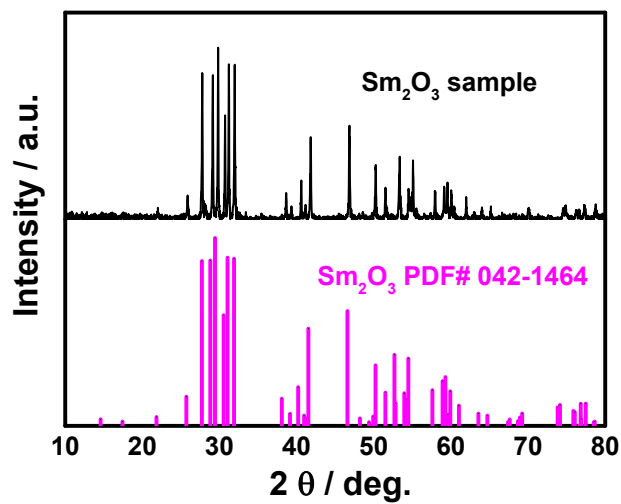

2

**Figure S7.** XRD spectra of Sm<sub>2</sub>O<sub>3</sub>.

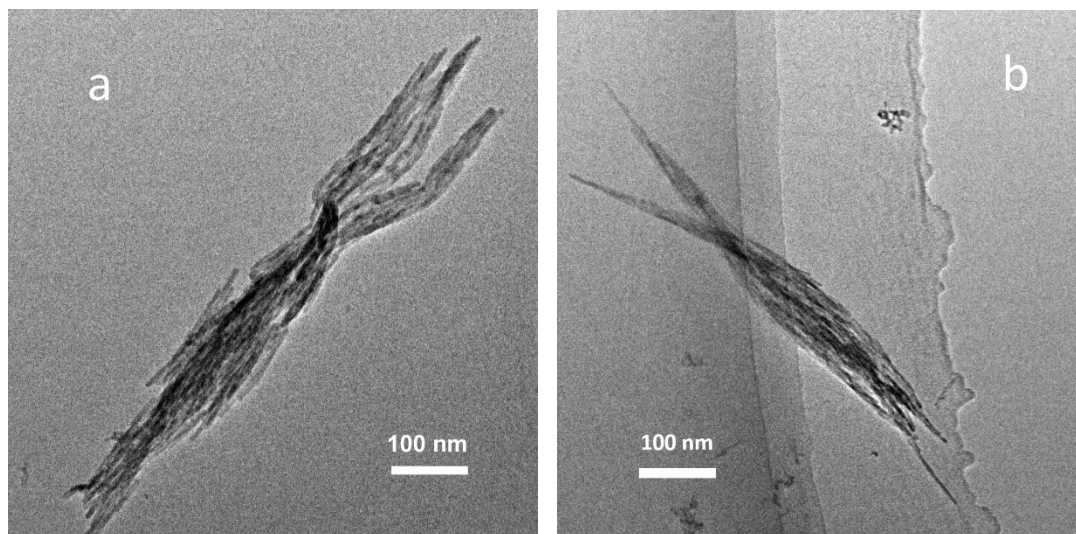

3

**Figure S8.** Representative TEM images of SmMn<sub>2</sub>O<sub>5</sub>-NRs

4 **Reference**

- 5 1. J. K. Nørskov, J. Rossmeisl, A. Logadottir, L. Lindqvist, J. R. Kitchin, T.  
6 Bligaard and H. Jónsson, *J. Phys. Chem. B*, 2004, **108**, 17886-17892.
- 7 2. J. Rossmeisl, J. K. Nørskov, C. D. Taylor, M. J. Janik and M. Neurock, *J.*  
8 *Phys. Chem. B*, 2006, **110**, 21833-21839.



- 1 3. A. A. Peterson, F. Abild-Pedersen, F. Studt, J. Rossmeisl and J. K. Nørskov,  
2 *Energy Environ. Sci.*, 2010, **3**, 1311-1315.
- 3 4. Y.-L. Lee, M. J. Gadre, Y. Shao-Horn and D. Morgan, *Phys. Chem. Chem.*  
4 *Phys.*, 2015, **17**, 21643-21663.
- 5 5. P. W. Atkins, in *Physical Chemistry*, 6th ed., Oxford University Press: Oxford,  
6 U. K., 1998, **485**, 925-927.
- 7 6. L. D. Chen, J. K. Nørskov and A. C. Luntz, *J. Phys. Chem. Lett.*, 2015, **6**, 175-  
8 179.
- 9 7. V. Viswanathan, H. A. Hansen, J. Rossmeisl and J. K. Nørskov, *J. Phys. Chem.*  
10 *Lett.*, 2012, **3**, 2948-2951.
- 11 8. J. Suntivich, H. A. Gasteiger, N. Yabuuchi and Y. Shao-Horn, *J. Electrochem.*  
12 *Soc.*, 2010, **157**, B1263.
- 13 9. R. D. Deegan, O. Bakajin, T. F. Dupont, G. Huber, S. R. Nagel and T. A.  
14 Witten, *Nature*, 1997, **389**, 827-829.
- 15 10. R. D. Deegan, O. Bakajin, T. F. Dupont, G. Huber, S. R. Nagel and T. A.  
16 Witten, *Phys. Rev. E*, 2000, **62**, 756-765.
- 17 11. Y. Garsany, O. A. Baturina, K. E. Swider-Lyons and S. S. Kocha, *Anal. Chem.*,  
18 2010, **82**, 6321-6328.
- 19 12. Y. Liang, Y. Li, H. Wang, J. Zhou, J. Wang, T. Regier and H. Dai, *Nat. Mater.*,  
20 2011, **10**, 780-786.
- 21 13. S. Wang, D. Yu, L. Dai, D. W. Chang and J.-B. Baek, *ACS Nano*, 2011, **5**,  
22 6202-6209.
- 23 14. R. Zhou, Y. Zheng, M. Jaroniec and S.-Z. Qiao, *ACS Catal.*, 2016, **6**, 4720-  
24 4728.
- 25 15. W. Xiao, D. Wang and X. W. Lou, *J. Phys. Chem. C.*, 2010, **114**, 1694-1700.
- 26 16. Y. Meng, W. Song, H. Huang, Z. Ren, S.-Y. Chen and S. L. Suib, *J. Am.*  
27 *Chem. Soc.*, 2014, **136**, 11452-11464.
- 28 17. Y. Gorlin and T. F. Jaramillo, *J. Am. Chem. Soc.*, 2010, **132**, 13612-13614.
- 29 18. J. Duan, S. Chen, S. Dai and S. Z. Qiao, *Adv. Funct. Mater.*, 2014, **24**, 2072-  
30 2078.
- 31 19. Y. Gorlin, C.-J. Chung, D. Nordlund, B. M. Clemens and T. F. Jaramillo, *ACS*  
32 *Catalysis*, 2012, **2**, 2687-2694.

33
